# Supplementary material
Source: publisher figshare collection journal article supplement (https://frontiersin.figshare.com/ndownloader/files/33967592)
Supplement: Supplementary file [file 33967592]

## ***Supplementary Material***

**Supplementary Table 1.** Incidence of venous thromboembolism in cancer patients from previous studies

| Study                 | Type of cancer    | Treatment    | Sample size      | VTE incidence |
|-----------------------|-------------------|--------------|------------------|---------------|
| Sharif-Kashani B (10) | Breast            | Chemotherapy | 403              | 1 (0.2%)      |
| Andtbacka RH (26)     | Breast            | Surgery      | 4,416 procedures | 7 (0.16%)     |
| Yamashita S (30)      | Colorectal cancer | Surgery      | 228              | 2 (0.9%)      |
| Walker AJ (31)        | Breast            | Surgery      | 10,109           | 507 (5.0%)    |
|                       | Breast            | Chemotherapy | 2,773            | 189 (6.8%)    |
| Momeni A (32)         | Breast            | Surgery      | 52,547           | 395 (0.8%)    |
| Agnelli G (33)        | Various           | Surgery      | 2,360            | 50 (2.1%)     |
| Kirwan CC (34)        | Breast            | Chemotherapy | 134              | 13 (9.7%)     |

VTE: venous thromboembolism

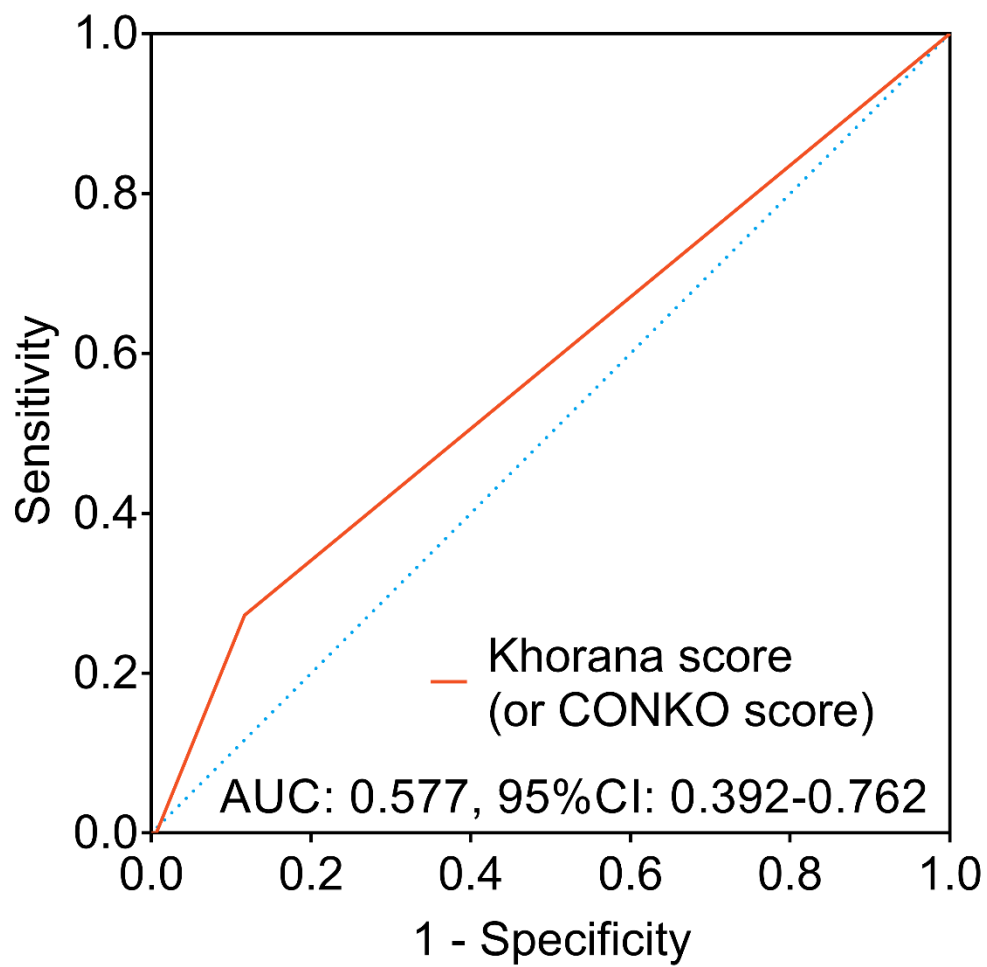

**Supplementary Figure 1.** Prediction of LDVT risk by Khorana score and CONKO score. LDVT, low-extremity deep vein thrombosis; AUC, area under the curve; CI, confidence interval.
